# Supplementary material
Source: PubMed Central journal article supplement (PMC7164776)
Supplement: NIHMS1051451-supplement-SI.pdf [file NIHMS1051451-supplement-SI.pdf]

## Supporting Information for

### Active Release of Nitric Oxide-Releasing Dendrimers from Electrospun Polyurethane Fibers

*Brittany V. Worley, Robert J. Soto, Paige C. Kinsley, and Mark H. Schoenfisch\**

Department of Chemistry, University of North Carolina at Chapel Hill, Chapel Hill, North  
Carolina 27599

\*To whom correspondence should be addressed: schoenfisch@unc.edu

#### Supporting Information

Table S1. Characterization and NO-release properties of G4 dendrimers.

Table S2. Inhibitory concentrations at 50% viability ( $IC_{50}$ ) against L929 mouse fibroblast cells.

Figure S1. Custom electrospinning apparatus in co-axial configuration.

Figure S2. Scanning electron micrographs and fiber diameter histograms of TP 470/HP 93A-G4 octylQA electrospun fibers.

Figure S3. Scanning electron micrographs of RITC-tagged TP 470/HP 93A electrospun fibers.

Figure S4. Representative NO-release profiles of electrospun fibers

Figure S5. Representative zone of inhibition images against planktonic bacteria.

Figure S6. Viability of planktonic bacteria after 2 h exposure to TP 470/HP 93A electrospun fibers.

Figure S7. Viability of planktonic bacteria after 24 h exposure to TP 470/HP 93A electrospun fibers.

Figure S8. Viability (%) of L929 mouse fibroblast cells exposed to control and NO-releasing TP 470/HP 93A-G4 octylQA fibers.

**Table S1.** Characterization and nitric oxide-release properties of G4 dendrimers in PBS (pH 7.4, 37 °C) as measured by a chemiluminescence NO analyzer<sup>a</sup>.

|               | No. Modified End Groups <sup>a</sup> | % Modified | Molec. Weight (Da) | [NO] <sub>max</sub> <sup>c</sup> (ppb/mg) | t <sub>max</sub> <sup>d</sup> (min) | t[NO] <sup>e</sup> (μmol/mg) | t <sub>1/2</sub> <sup>f</sup> (min) | t <sub>d</sub> <sup>g</sup> (h) |
|---------------|--------------------------------------|------------|--------------------|-------------------------------------------|-------------------------------------|------------------------------|-------------------------------------|---------------------------------|
| G4 octyl/NO   | 47 ± 3                               | 74 ± 5     | 25987.7            | 4760 ± 920                                | 2.7 ± 0.4                           | 0.92 ± 0.06                  | 25 ± 6                              | 9 ± 1                           |
| G4 octylQA/NO | 39 ± 5                               | 61 ± 8     | 23953.6            | 1570 ± 150                                | 2.0 ± 0.3                           | 1.03 ± 0.06                  | 115 ± 6                             | 16 ± 1                          |

<sup>a</sup>For all measurements, n ≥ 3 pooled experiments. <sup>b</sup>Determined by <sup>1</sup>H NMR. <sup>c</sup>Maximum flux of NO release. <sup>d</sup>Time required to reach maximum flux. <sup>e</sup>Total NO payload released. <sup>f</sup>NO release half-life. <sup>g</sup>Duration of NO release.

**Table S2.** Inhibitory concentrations at 50% viability (IC<sub>50</sub>) against L929 mouse fibroblast cells.<sup>a</sup>

|               | 2h IC <sub>50</sub> (μg/mL) | 24h IC <sub>50</sub> (μg/mL) |
|---------------|-----------------------------|------------------------------|
| G4 octyl      | 200                         | 60                           |
| G4 octyl/NO   | 360                         | 100                          |
| G4 octylQA    | 300                         | 60                           |
| G4 octylQA/NO | 280                         | 40                           |

<sup>a</sup>For all measurements, n ≥ 3 pooled experiments

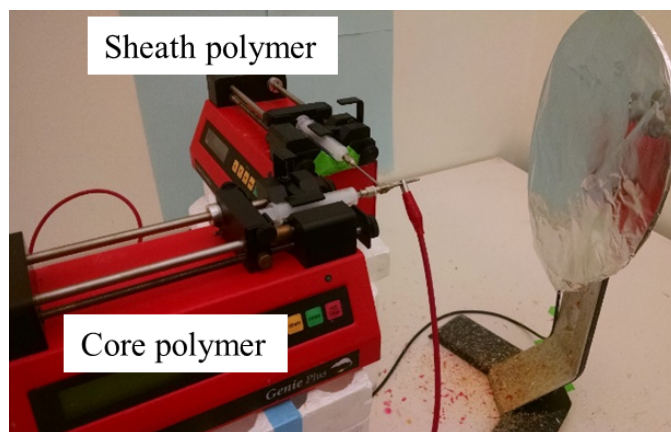

**Figure S1.** Custom electrospinning apparatus in co-axial configuration

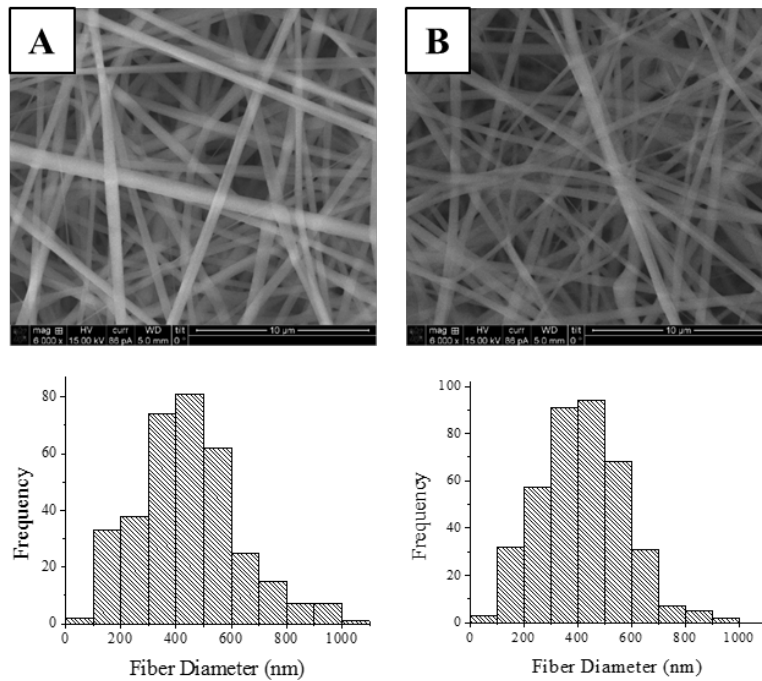

**Figure S2.** Scanning electron micrographs of (A) TP 470/HP 93A-G4 octylQA and (B) TP 470/HP 93A-G4 octylQA/NO electrospun fibers with corresponding fiber diameter histograms.

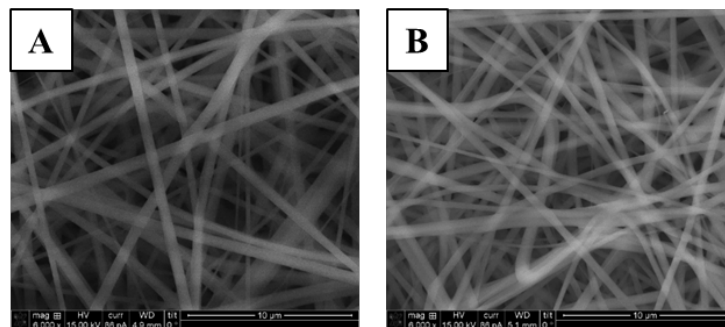

**Figure S3.** Scanning electron micrographs of (A) TP 470/HP 93A-G4 RITC octyl/NO and (B) TP 470/HP 93A-G4 RITC octylQA/NO electrospun fibers.

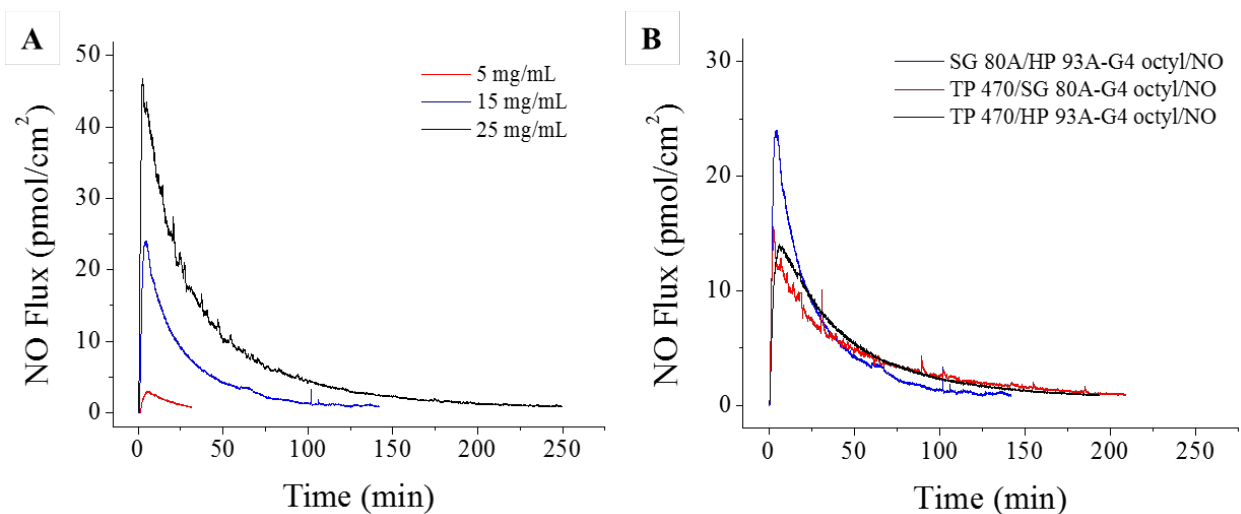

**Figure S4.** Representative NO-release profiles for (A) SG 80A/HP 93A-G4 octyl/NO fibers at 5 (red), 15 (blue), and 25 (black) mg/mL dendrimer concentrations, and (B) G4 octyl/NO-doped electrospun SG 80A/HP 93A (blue), TP 470/SG 80A (red), TP 470/HP 93A (black) fibers.

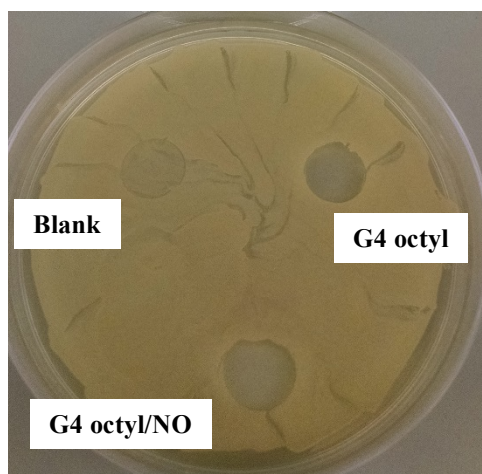

**Figure S5.** Zone of inhibition images against MRSA showing no bacteria growth under control and NO-releasing TP 470/SG80A-G4 octyl fibers

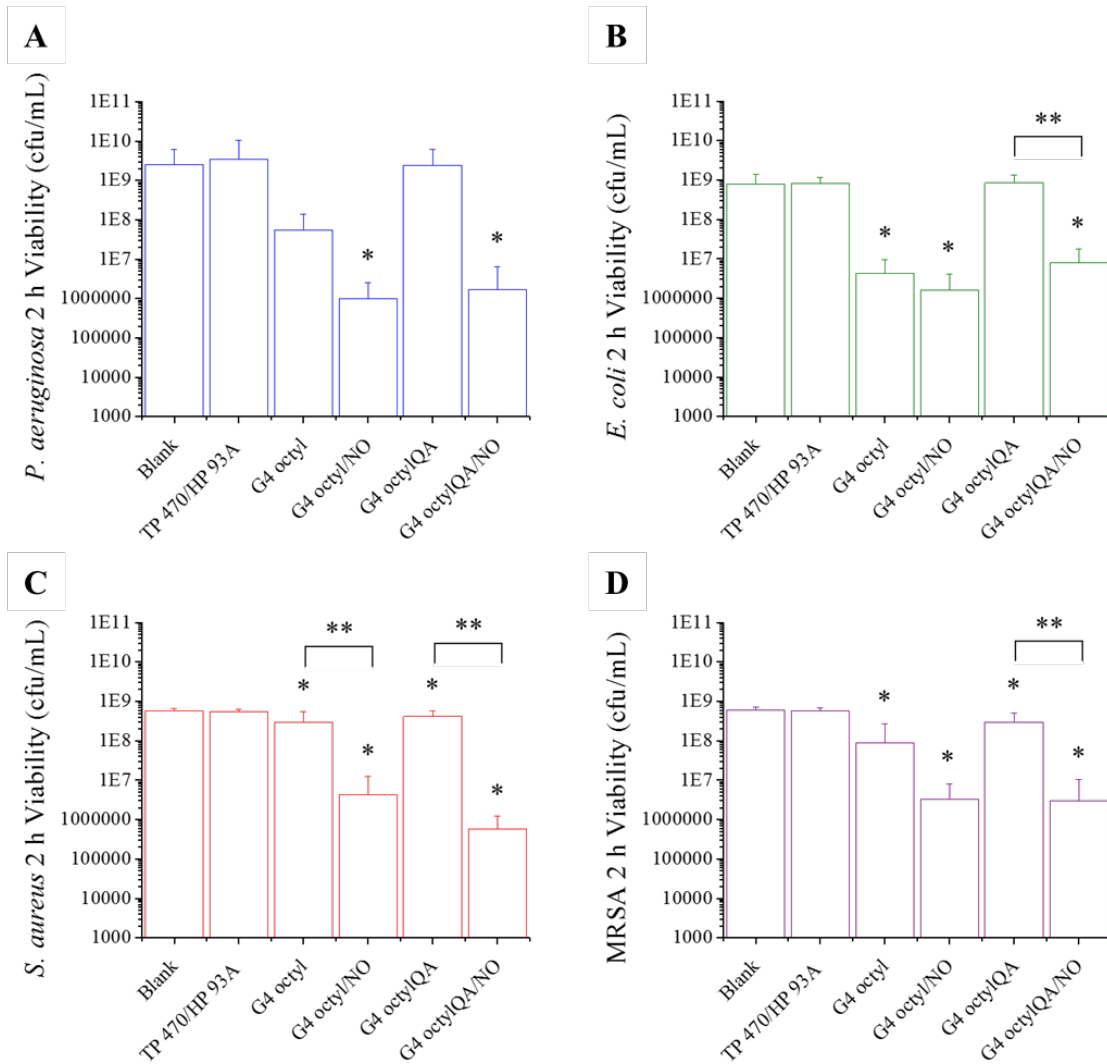

**Figure S6.** Viability of (A) *P. aeruginosa*, (B) *E. coli*, (C) *S. aureus*, and (D) MRSA after 2 h exposure to blank, control, and NO-releasing co-axial electrospun TP 470/HP 93A fibers. For all measurements,  $n \geq 3$  pooled experiments with error bars representing standard deviation of the mean. Asterisk (\*) indicates significant differences from blank ( $p < 0.05$ ) and double asterisk (\*\*) indicates significant differences ( $p < 0.05$ ) using two-tailed student's t-test.

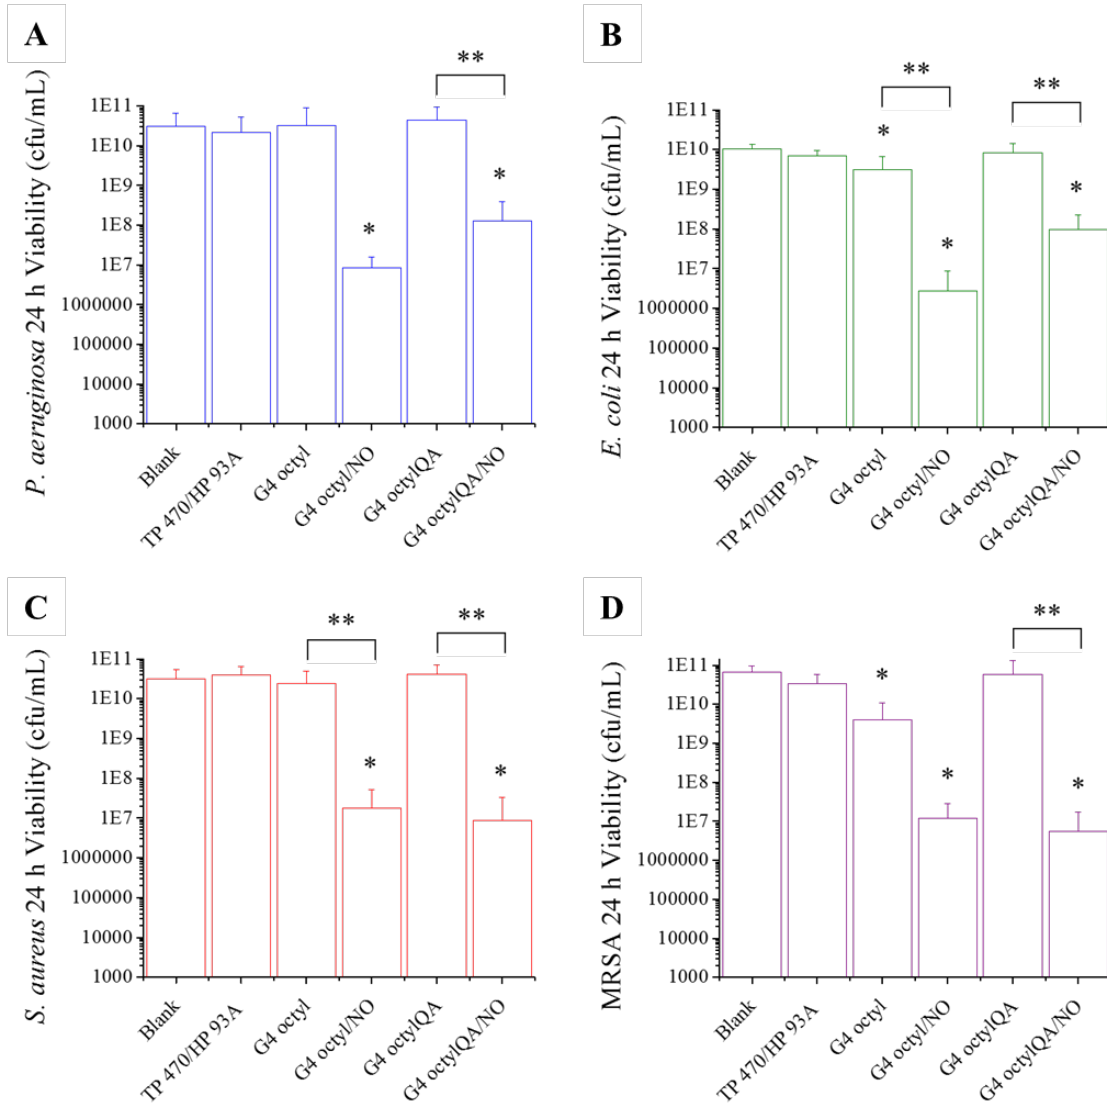

**Figure S7.** Viability of (A) *P. aeruginosa*, (B) *E. coli*, (C) *S. aureus*, and (D) MRSA after 24 h exposure to blank, control, and NO-releasing co-axial electrospun TP 470/HP 93A fibers. For all measurements,  $n \geq 3$  pooled experiments with error bars representing standard deviation of the mean. Asterisk (\*) indicates significant differences from blank ( $p < 0.05$ ) and double asterisk (\*\*) indicates significant differences ( $p < 0.05$ ) using two-tailed student's t-test.

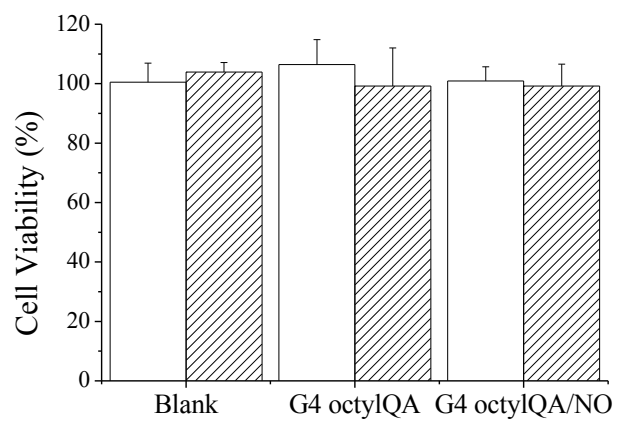

**Figure S8.** Viability (%) of L929 mouse fibroblast cells following 2 h (solid) or 24 h (diagonal lines) exposure to blank, control, and NO-releasing electrospun TP 470/HP 93A-G4 octylQA fibers. For all measurements,  $n \geq 3$  pooled experiments with error bars representing standard deviation of the mean.
